# Supplementary material for: Phylogenetic and Complementation Analysis of a Single-Stranded DNA Binding Protein Family from Lactococcal Phages Indicates a Non-Bacterial Origin
Source: PubMed Central journal article supplement (PMC3208561; doi:10.1371/journal.pone.0026942), 2011-11-04

0.45,-0.05,-0.88  
0.32,0.93,0.11  
0.82,0.34,-0.44

Orf14<sub>bL67</sub>-like phage SSBs

Mitochondrial SSBs

Gram+ SSBs

Gram- SSBs

Archaeal RPAs

Archaeal SSBs

Eucaryotic RPAs

50 0000007451170 40 000000415507044

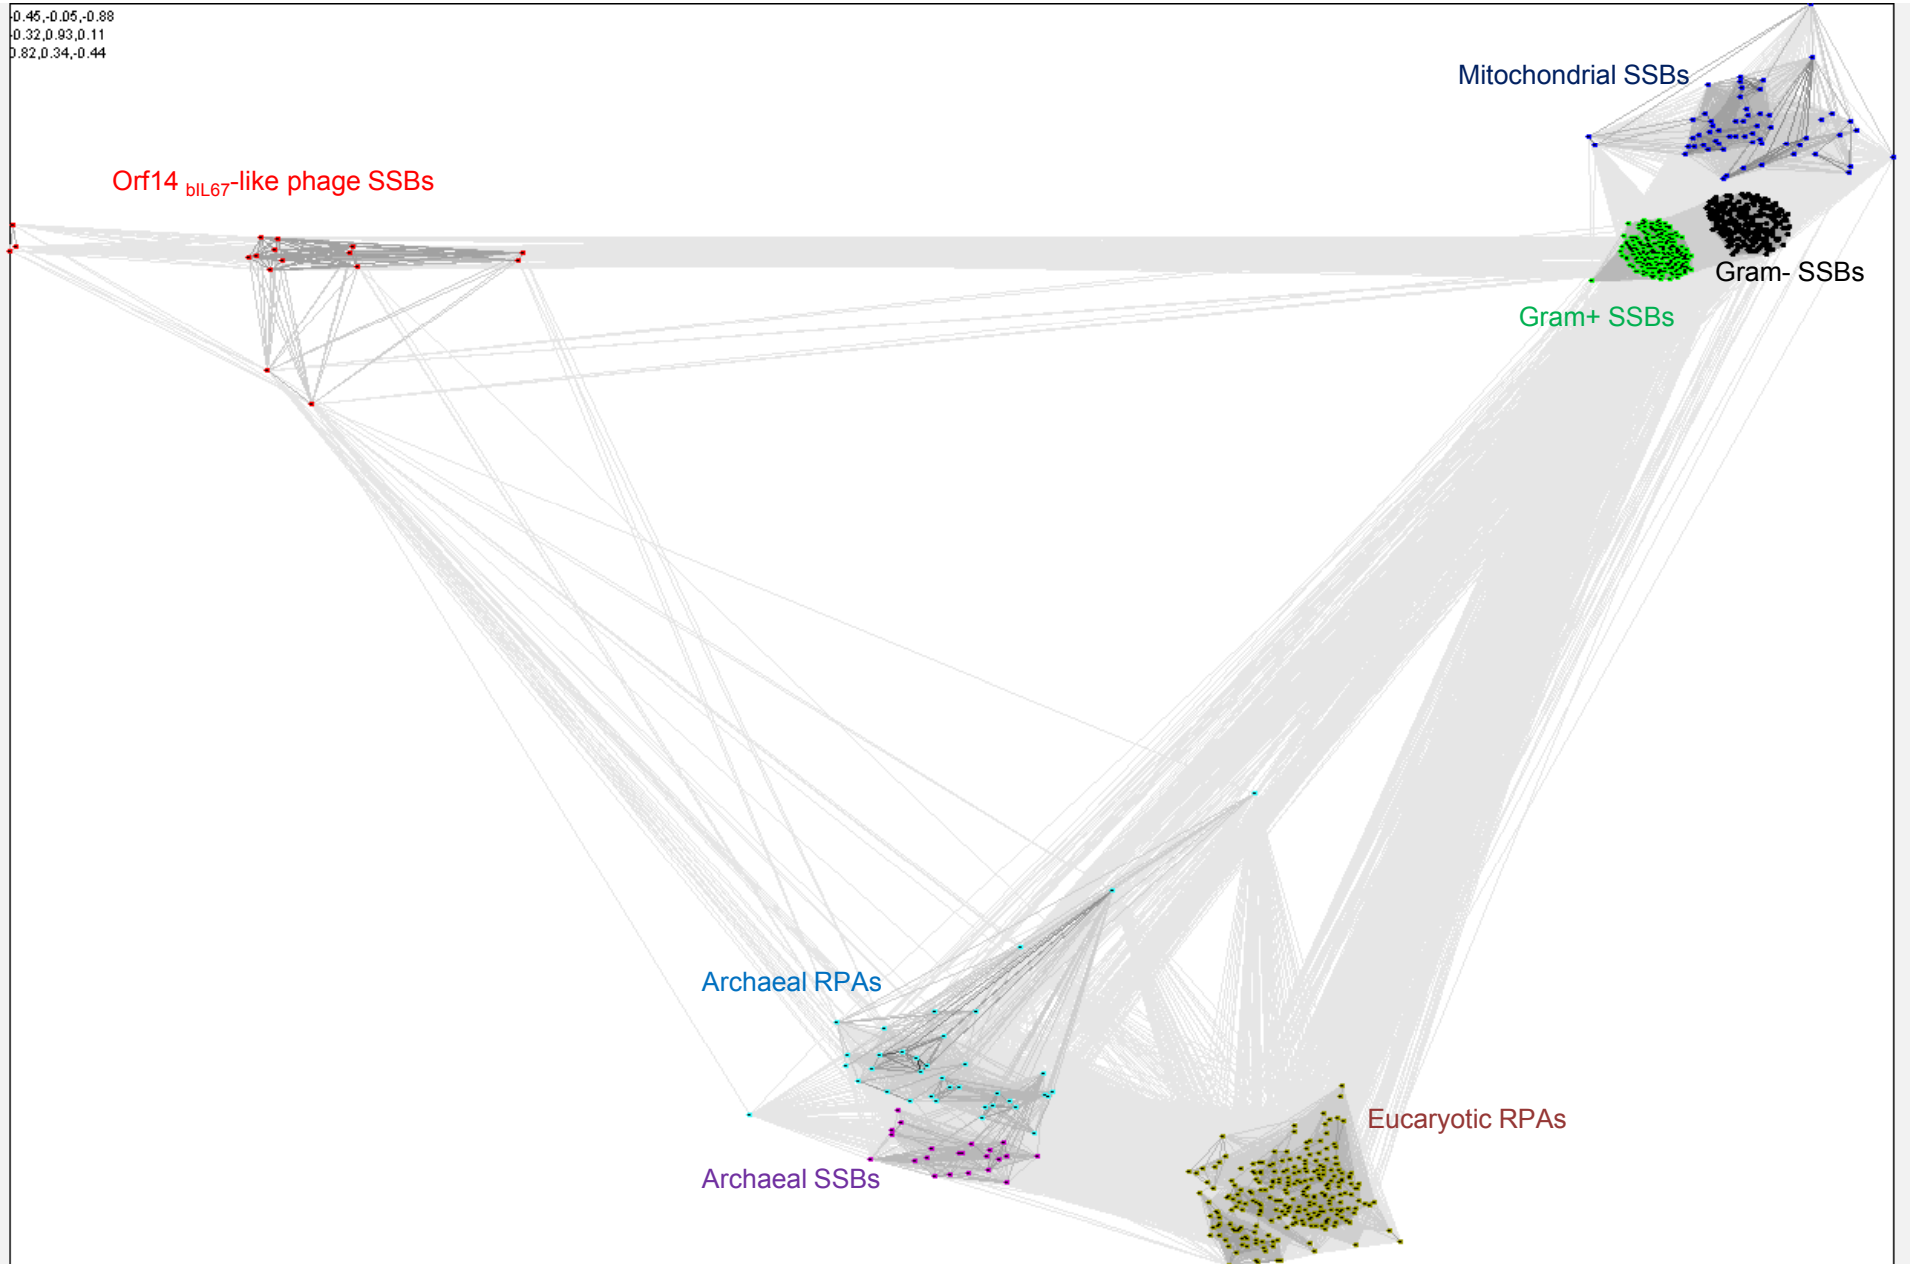

Supplement: pone.0026942.s002.pdf [file pone.0026942.s002.pdf]
